# Supplementary material for: Microbiome Dynamics Associated With the Atacama Flowering Desert
Source: Front Microbiol. 2020 Jan 22;10:3160. doi: 10.3389/fmicb.2019.03160 (PMC6990129; doi:10.3389/fmicb.2019.03160)
Supplement: Supplementary file 2 [file Table_1.xlsx]

## Sheet: Table S1
Table S1: Geographical, environmental and physical-chemical parameters of the sampling sites (localities).
Characteristics	Quebrada Seca	El Algarrobo	Pajonales
Coordinates	S 27° 28' 3“ W 70° 50' 22"	S 28°46'10" W 70°57'53"	S 29°17'35" W 71°01'46"
Meters Above Sea Level	147	1008	590
Location	Coastal	Interior Valley	Interior Valley
Average Annual Rainfall (mm)	31	57	63
Average Annual Temperature (°C)	16.8	13.9	13.6
Type of Plant Population	Clustered	Scattered	Clustered
Soil Texture	Sand	Clay	Clay
N (mg/Kg)	3	10	9
P (mg/Kg)	28	15	17
K (mg/Kg)	120	217	812
Organic Matter (%)	0.55	0.95	0.78
pH	9.24	8	8.59
Electric Conductance (dS/m)	0.221	0.127	0.355

## Sheet: Table S2
Tabla S2: Comparison along the gradient - number of sequences and OTUs per sample, "Locality" and "Sample type" analysis. Sample codes indicate: locality-year-sampletype-ID biological replicate (QS - Quebrada Seca, EA - El Algarrobo, Pa - Pajonales; 15 - year 2015; 1 - Rhizosphere, 2 - Bulk soil; A,B or C - biological replicates of the sample (each composed by 10 subsamples)
	Fungal ITS2			Prokaryotes 16S rRNA
Sample	Raw Sequences	High Quality Sequences	Number of OTU's	Raw Sequences	High Quality Secuences	Number of OTU's
QS15-1A	161431	158924	87	74108	72947	1938
QS15-1B	212838	211375	92	101611	100120	2063
QS15-1C	240070	238806	100	95521	94142	2019
QS15-2A	180509	147577	106	78757	76713	2157
QS15-2B	196710	174353	106	76755	74800	2176
QS15-2C	206383	185503	123	80158	78139	2174
EA15-1A	138916	136940	107	68171	66405	1847
EA15-1B	114108	113026	115	70430	69051	1864
EA15-1C	138571	136534	109	80829	79124	1980
EA15-2A	223582	213060	183	58687	56791	1986
EA15-2B	230484	220898	211	57118	55150	1989
EA15-2C	255543	244656	218	40687	39804	1793
PA15-1A	217755	197906	292	75045	73928	2197
PA15-1B	241532	215890	285	98437	97065	2278
PA15-1C	256143	230296	272	102204	100751	2284
PA15-2A	187841	170745	285	69087	67859	2062
PA15-2B	273236	239334	307	96752	95269	2214
PA15-2C	257669	236299	293	111158	109568	2193
Total	3733321	3472122	716	1435515	1407626	3293
QS	Quebrada Seca
EA	El Algarrobo
PA	Pajonales

## Sheet: Table S3
Table S3: ADONIS, Fungi "locality" factor, 999 permutations
Fungi	Df	Sum of Sqs	Mean Sqs	F	R2	Pr (>F)
Locality	2	10.1529	5.0764	9.4476	0.55746	0.001
Residuals	15	8.0599	0.5373	0.44254
Total	17	18.2127	1

## Sheet: Table S4
Table S4: ADONIS, Prokaryotes "locality" factor, 999 permutations
Fungi	Df	Sum of Sqs	Mean Sqs	F	R2	Pr (>F)
Locality	2	0.1966	0.098301	10.425	0.58159	0.001
Residuals	15	0.14144	0.009429	0.41841
Total	17	0.33804	1

## Sheet: Table S5
Table S5: ADONIS, Fungi "Sample type" factor, 999 permutations
Fungi	Df	Sum of Sqs	Mean Sqs	F	R2	Pr (>F)
Soil type	1	2.4395	2.43954	2.4746	0.13395	0.093
Residuals	16	15.7732	0.98583	0.86605
Total	17	18.2127	1

## Sheet: Table S6
Table S6: ADONIS, Prokaryotes "Sample type" factor, 999 permutations
Prokaryota	Df	Sum of Sqs	Mean Sqs	F	R2	Pr (>F)
Soil type	1	0.03694	0.036942	1.976	0.10993	0.108
Residuals	16	0.29913	0.018695	0.89007
Total	17	0.33607	1

## Sheet: Table S7
Table S7: Rhizosphere specific and exclusive OUTs
	Fungi
Locality	Specific OTUs	Most abundant	Exclusive OTUs	Most abundant	Detail
Quebrada Seca	28	Fusarium concentricum, species of the class Sordariomycetes	6	Scedosporium prolificans, Plectosphaerella cucumerina, Fusarium concentricum	Table S8
El Algarrobo	48	orders Pleosporales and Hypocreales, Mycosphaerella tassiana	31	Stagonosporopsis dennisii, Alternaria betaekenyensis and Penicillium jensenii	Table S9
Pajonales	49	class Sordariomycetes and the genus Cystolepiota	12	Auxarthron sp.	Table S10
	Prokaryotes
Locality	Specific OTUs	Most abundant	Exclusive OTUs		Detail
Quebrada Seca	223	Promicromonospora, Algoriphagus, families Phyllobacteriaceae and Erythrobacteraceae	44	Parapedobacter, Methylophaga, in addition 10 OTUs of Pseudomonas sp.	Table S11
El Algarrobo	276	Blastococcus, Rubrobacter, Streptomyces, Geodermatophilus, family Micrococcaceae	13	family Chitinophagaceae	Table S12
Pajonales	168	Nocardioides, Bacillus, phylum Saccharibacteria	4	Stackebrandti, Rhizobium, Phyllobacterium, Chryseobacterium	Table S13

## Sheet: Table S8
Table S8: Rhizosphere specific Fungi of Quebrada Seca: analysis "locality" and "sample type"
OTU	Test-Statistic	P	FDR_P	Fold Change	Bulk_mean	Rhizosphere_mean	taxonomy
denovo2660	-2.01947	0.113566	0.333429	-	0	400	k__Fungi; p__Ascomycota; c__Sordariomycetes; o__Microascales; f__Microascaceae; g__Scedosporium; s__Scedosporium_prolificans
denovo537	-1.9234	0.126774	0.333429	-	0	105.333	k__Fungi; p__Ascomycota; c__Sordariomycetes; o__unidentified; f__unidentified; g__unidentified; s__unidentified
denovo3214	-1.80591	0.145236	0.333429	-	0	92.3333	k__Fungi; p__Ascomycota; c__Sordariomycetes; o__Glomerellales; f__Plectosphaerellaceae; g__Plectosphaerella; s__Plectosphaerella_cucumerina
denovo1467	-1.86192	0.136098	0.333429	-	0	51.3333	k__Fungi; p__Ascomycota; c__Sordariomycetes; o__unidentified; f__unidentified; g__unidentified; s__unidentified
denovo2704	-2.04456	0.110371	0.333429	-	0	30.3333	k__Fungi; p__Ascomycota; c__Sordariomycetes; o__Hypocreales; f__Nectriaceae; g__Fusarium; s__Fusarium_concentricum
denovo971	-1.71233	0.161998	0.337798	-	0	22.3333	k__Fungi; p__Ascomycota; c__Sordariomycetes; o__Hypocreales; f__Nectriaceae; g__unidentified; s__unidentified
denovo3288	-2.06196	0.108211	0.333429	98	0.333333	32.6667	k__Fungi; p__Ascomycota; c__Sordariomycetes; o__Hypocreales; f__Nectriaceae; g__Fusarium; s__unidentified
denovo486	-2.91051	0.0436559	0.236737	75300	0.666667	50200	k__Fungi; p__Ascomycota; c__Sordariomycetes; o__unidentified; f__unidentified; g__unidentified; s__unidentified
denovo1607	-10.8669	0.000407006	0.0165855	3.66502	7222.33	26470	k__Fungi; p__Ascomycota; c__Sordariomycetes; o__Hypocreales; f__Nectriaceae; g__Fusarium; s__Fusarium_concentricum
denovo231	-3.10214	0.036146	0.229387	125.553	140.333	17619.3	k__Fungi; p__Ascomycota; c__Sordariomycetes; o__Glomerellales; f__Plectosphaerellaceae; g__Plectosphaerella; s__Plectosphaerella_cucumerina
denovo988	-2.0025	0.115785	0.333429	287.969	10.6667	3071.67	k__Fungi; p__Ascomycota; c__Sordariomycetes; o__Sordariales; f__Chaetomiaceae; g__Chaetomium; s__Chaetomium_undulatulum
denovo591	-2.14998	0.0979838	0.332737	63.4769	43.3333	2750.67	k__Fungi; p__unidentified; c__unidentified; o__unidentified; f__unidentified; g__unidentified; s__unidentified
denovo633	-2.60315	0.0598497	0.283263	4.19595	626	2626.67	k__Fungi; p__Ascomycota; c__Dothideomycetes; o__Pleosporales; f__Pleosporaceae; g__Alternaria; s__Alternaria_aspera
denovo2969	-1.68216	0.167829	0.337798	3.78788	209	791.667	k__Fungi; p__Mortierellomycota; c__Mortierellomycetes; o__Mortierellales; f__Mortierellaceae; g__Mortierella; s__Mortierella_gemmifera
denovo1290	-14.5669	0.000129171	0.0105274	5.52711	110.667	611.667	k__Fungi; p__Ascomycota; c__Eurotiomycetes; o__Eurotiales; f__Aspergillaceae; g__Penicillium; s__Penicillium_glandicola
denovo2230	-1.60378	0.184029	0.34479	3.89845	151	588.667	k__Fungi; p__Ascomycota; c__Dothideomycetes; o__Pleosporales; f__unidentified; g__unidentified; s__unidentified
denovo2968	-1.83399	0.140575	0.333429	53.7273	7.33333	394	k__Fungi; p__Ascomycota; c__Sordariomycetes; o__Sordariales; f__Chaetomiaceae; g__Chaetomium; s__Chaetomium_carinthiacum
denovo3032	-2.27125	0.085609	0.31925	56	1.66667	93.3333	k__Fungi; p__Ascomycota; c__Sordariomycetes; o__Hypocreales; f__Nectriaceae; g__unidentified; s__unidentified
denovo3403	-1.56599	0.192411	0.352393	11	3	33	k__Fungi; p__Ascomycota; c__Dothideomycetes; o__Capnodiales; f__Cladosporiaceae; g__Cladosporium; s__Cladosporium_exasperatum
denovo3509	-3.97573	0.0164597	0.134146	5.11765	5.66667	29	k__Fungi; p__Ascomycota; c__Sordariomycetes; o__unidentified; f__unidentified; g__unidentified; s__unidentified
denovo1785	-1.65353	0.173565	0.338266	13	2	26	k__Fungi; p__Ascomycota; c__Sordariomycetes; o__Hypocreales; f__Stachybotryaceae; g__Stachybotrys; s__Stachybotrys_chartarum
denovo3225	-1.73768	0.157265	0.337798	15.25	1.33333	20.3333	k__Fungi; p__Ascomycota; c__Sordariomycetes; o__Hypocreales; f__Stachybotryaceae; g__Stachybotrys; s__Stachybotrys_chartarum
denovo2691	-5.9604	0.00397788	0.0498765	6	3	18	k__Fungi; p__Ascomycota; c__Eurotiomycetes; o__Eurotiales; f__Aspergillaceae; g__Aspergillus; s__Aspergillus_fumisynnematus
denovo415	-2.26526	0.0861778	0.31925	49	0.333333	16.3333	k__Fungi; p__Ascomycota; c__Sordariomycetes; o__Hypocreales; f__Nectriaceae; g__Fusarium; s__Fusarium_concentricum
denovo774	-2.47918	0.068271	0.292847	7	2.33333	16.3333	k__Fungi; p__Ascomycota; c__Sordariomycetes; o__Hypocreales; f__Hypocreales_fam_Incertae_sedis; g__Emericellopsis; s__Emericellopsis_pallida
denovo625	-4.89898	0.00804989	0.0937238	9	1	9	k__Fungi; p__Ascomycota; c__Sordariomycetes; o__Hypocreales; f__Nectriaceae; g__Fusarium; s__Fusarium_kurunegalense
denovo3092	-3.05085	0.0379966	0.229387	5.4	1.66667	9	k__Fungi; p__Ascomycota; c__Sordariomycetes; o__Hypocreales; f__Hypocreales_fam_Incertae_sedis; g__Emericellopsis; s__Emericellopsis_pallida
denovo2839	-2.00698	0.115195	0.333429	13	0.666667	8.66667	k__Fungi; p__Ascomycota; c__Sordariomycetes; o__Hypocreales; f__Hypocreales_fam_Incertae_sedis; g__Emericellopsis; s__Emericellopsis_pallida

## Sheet: Table S9
Table S9: Rhizosphere specific Fungi of El Algarrobo: analysis "locality" and "sample type"
OTU	Test-Statistic	P	FDR_P	Fold Change	Bulk_mean	Rhizosphere_mean	taxonomy
denovo3546	-5.549	0.00516014	0.0319164	-	0	20421.3	k__Fungi; p__Ascomycota; c__Sordariomycetes; o__Hypocreales; f__unidentified; g__unidentified; s__unidentified
denovo1621	-7.98037	0.00133632	0.013425	-	0	1771.33	k__Fungi; p__Ascomycota; c__Dothideomycetes; o__Pleosporales; f__Didymellaceae; g__Stagonosporopsis; s__Stagonosporopsis_dennisii
denovo2411	-4.14276	0.0143443	0.0684428	-	0	1192	k__Fungi; p__Ascomycota; c__Dothideomycetes; o__Pleosporales; f__Pleosporaceae; g__Alternaria; s__Alternaria_betae-kenyensis
denovo785	-7.55759	0.00164269	0.0148165	-	0	1111	k__Fungi; p__Ascomycota; c__Eurotiomycetes; o__Eurotiales; f__Aspergillaceae; g__Penicillium; s__Penicillium_jensenii
denovo2887	-3.63183	0.022124	0.0879693	-	0	998	k__Fungi; p__Ascomycota; c__Sordariomycetes; o__Xylariales; f__unidentified; g__unidentified; s__unidentified
denovo943	-2.21643	0.0909731	0.238914	-	0	322.667	k__Fungi; p__Mortierellomycota; c__Mortierellomycetes; o__Mortierellales; f__Mortierellaceae; g__Mortierella; s__Mortierella_alpina
denovo1361	-4.00487	0.016065	0.0735027	-	0	244.333	k__Fungi; p__Ascomycota; c__Dothideomycetes; o__Pleosporales; f__Pleosporaceae; g__Alternaria; s__Alternaria_aspera
denovo2055	-2.49543	0.0670932	0.194862	-	0	118	k__Fungi; p__Ascomycota; c__Dothideomycetes; o__Pleosporales; f__unidentified; g__unidentified; s__unidentified
denovo965	-2.41281	0.0733315	0.207565	-	0	115.667	k__Fungi; p__Ascomycota; c__Sordariomycetes; o__Hypocreales; f__Nectriaceae; g__Gibberella; s__Gibberella_tricincta
denovo3036	-4.06673	0.015264	0.0708079	-	0	70.3333	k__Fungi; p__Ascomycota; c__Dothideomycetes; o__Capnodiales; f__Mycosphaerellaceae; g__Mycosphaerella; s__Mycosphaerella_tassiana
denovo2967	-3.92527	0.0171712	0.0764692	-	0	46	k__Fungi; p__unidentified; c__unidentified; o__unidentified; f__unidentified; g__unidentified; s__unidentified
denovo1926	-2.17246	0.0955467	0.247385	-	0	44.3333	k__Fungi; p__unidentified; c__unidentified; o__unidentified; f__unidentified; g__unidentified; s__unidentified
denovo2032	-2.29063	0.0837994	0.231314	-	0	36	k__Fungi; p__Ascomycota; c__Dothideomycetes; o__Pleosporales; f__unidentified; g__unidentified; s__unidentified
denovo139	-1.73297	0.158132	0.320442	-	0	32.3333	k__Fungi; p__Ascomycota; c__Pezizomycetes; o__Pezizales; f__Pyronemataceae; g__Scutellinia; s__unidentified
denovo138	-1.39523	0.235424	0.392714	-	0	29.6667	k__Fungi; p__Ascomycota; c__Sordariomycetes; o__Hypocreales; f__Nectriaceae; g__Fusarium; s__Fusarium_concentricum
denovo104	-2.52614	0.0649311	0.190237	-	0	28.6667	k__Fungi; p__Ascomycota; c__Sordariomycetes; o__Xylariales; f__unidentified; g__unidentified; s__unidentified
denovo2059	-2.23464	0.0891502	0.237337	-	0	28	k__Fungi; p__Ascomycota; c__Eurotiomycetes; o__Eurotiales; f__Aspergillaceae; g__Penicillium; s__Penicillium_jensenii
denovo2293	-2.06452	0.107899	0.2664	-	0	21.3333	k__Fungi; p__Ascomycota; c__Dothideomycetes; o__Pleosporales; f__unidentified; g__unidentified; s__unidentified
denovo461	-2.82675	0.0475016	0.160041	-	0	19.3333	k__Fungi; p__Ascomycota; c__Dothideomycetes; o__Pleosporales; f__Phaeosphaeriaceae; g__Paraphoma; s__unidentified
denovo2554	-3.78571	0.0193402	0.078776	-	0	17.6667	k__Fungi; p__Ascomycota; c__Sordariomycetes; o__Microascales; f__Microascaceae; g__Scopulariopsis; s__Scopulariopsis_acremonium
denovo3268	-2.82031	0.0478132	0.160041	-	0	17	k__Fungi; p__Ascomycota; c__Dothideomycetes; o__Pleosporales; f__Pleosporaceae; g__Alternaria; s__Alternaria_betae-kenyensis
denovo2364	-1.40381	0.233048	0.392714	-	0	13.6667	k__Fungi; p__Ascomycota; c__Eurotiomycetes; o__Eurotiales; f__Aspergillaceae; g__Penicillium; s__Penicillium_jensenii
denovo2809	-1.09091	0.336622	0.392714	-	0	12	k__Fungi; p__Ascomycota; c__Dothideomycetes; o__Capnodiales; f__Cladosporiaceae; g__Cladosporium; s__Cladosporium_exasperatum
denovo2691	-1.43805	0.223803	0.392714	-	0	11.3333	k__Fungi; p__Ascomycota; c__Eurotiomycetes; o__Eurotiales; f__Aspergillaceae; g__Aspergillus; s__Aspergillus_fumisynnematus
denovo521	-3.05452	0.0378606	0.140505	-	0	10.3333	k__Fungi; p__Ascomycota; c__Sordariomycetes; o__Sordariales; f__Sordariales_fam_Incertae_sedis; g__Monosporascus; s__Monosporascus_ibericus
denovo2312	-2.23077	0.0895344	0.237337	-	0	9.66667	k__Fungi; p__Ascomycota; c__Dothideomycetes; o__Pleosporales; f__unidentified; g__unidentified; s__unidentified
denovo554	-1.47368	0.21457	0.385304	-	0	9.33333	k__Fungi; p__Ascomycota; c__Dothideomycetes; o__Pleosporales; f__Pleosporaceae; g__Alternaria; s__Alternaria_lolii
denovo1290	-9	0.000843833	0.0110822	-	0	9	k__Fungi; p__Ascomycota; c__Eurotiomycetes; o__Eurotiales; f__Aspergillaceae; g__Penicillium; s__Penicillium_glandicola
denovo2795	-2.72554	0.0526847	0.166007	-	0	8.66667	k__Fungi; p__Ascomycota; c__Dothideomycetes; o__Pleosporales; f__unidentified; g__unidentified; s__unidentified
denovo3584	-1.61556	0.181493	0.346392	-	0	8.66667	k__Fungi; p__Ascomycota; c__Dothideomycetes; o__Pleosporales; f__Didymellaceae; g__Didymella; s__Didymella_rhei
denovo2992	-5	0.00749043	0.0416967	-	0	6.66667	k__Fungi; p__Ascomycota; c__unidentified; o__unidentified; f__unidentified; g__unidentified; s__unidentified
denovo3469	-17.0451	6.94784e-05	0.00286345	158502	0.333333	52834	k__Fungi; p__Ascomycota; c__Dothideomycetes; o__Pleosporales; f__unidentified; g__unidentified; s__unidentified
denovo2087	-1.14637	0.315557	0.392714	3364	0.333333	1121.33	k__Fungi; p__Ascomycota; c__Dothideomycetes; o__Patellariales; f__Patellariales_fam_Incertae_sedis; g__Hysteropatella; s__Hysteropatella_prostii
denovo1712	-1.4959	0.20901	0.379398	409	0.333333	136.333	k__Fungi; p__Ascomycota; c__Ascomycota_cls_Incertae_sedis; o__Ascomycota_ord_Incertae_sedis; f__Ascomycota_fam_Incertae_sedis; g__Phaeotheca; s__Phaeotheca_triangularis
denovo2398	-4.51444	0.0107037	0.0525739	254	0.666667	169.333	k__Fungi; p__unidentified; c__unidentified; o__unidentified; f__unidentified; g__unidentified; s__unidentified
denovo3651	-7.13178	0.00204397	0.0159663	206	0.666667	137.333	k__Fungi; p__Ascomycota; c__Eurotiomycetes; o__Onygenales; f__Onygenales_fam_Incertae_sedis; g__Chrysosporium; s__Chrysosporium_synchronum
denovo2873	-2.24584	0.0880505	0.237168	16.9565	7.66667	130	k__Fungi; p__Ascomycota; c__Sordariomycetes; o__Hypocreales; f__Ophiocordycipitaceae; g__Hirsutella; s__unidentified
denovo2968	-4.90123	0.00803688	0.0421628	6.5	12	78	k__Fungi; p__Ascomycota; c__Sordariomycetes; o__Sordariales; f__Chaetomiaceae; g__Chaetomium; s__Chaetomium_carinthiacum
denovo950	-2.95842	0.0416197	0.150685	23.9778	15	359.667	k__Fungi; p__Ascomycota; c__Dothideomycetes; o__Pleosporales; f__Pleosporaceae; g__Alternaria; s__Alternaria_lolii
denovo1934	-2.58912	0.06074	0.181135	3.27049	40.6667	133	k__Fungi; p__Ascomycota; c__Eurotiomycetes; o__Chaetothyriales; f__Herpotrichiellaceae; g__Coniosporium; s__Coniosporium_apollinis
denovo3165	-2.72864	0.0525166	0.166007	4.06475	46.3333	188.333	k__Fungi; p__Ascomycota; c__Dothideomycetes; o__Pleosporales; f__Sporormiaceae; g__Preussia; s__unidentified
denovo2121	-2.72637	0.0526397	0.166007	6.70513	52	348.667	k__Fungi; p__Basidiomycota; c__Agaricomycetes; o__Cantharellales; f__Ceratobasidiaceae; g__unidentified; s__unidentified
denovo3403	-4.73846	0.00904749	0.0464902	10.7985	91	982.667	k__Fungi; p__Ascomycota; c__Dothideomycetes; o__Capnodiales; f__Cladosporiaceae; g__Cladosporium; s__Cladosporium_exasperatum
denovo1607	-1.25286	0.2785	0.392714	11.6194	120	1394.33	k__Fungi; p__Ascomycota; c__Sordariomycetes; o__Hypocreales; f__Nectriaceae; g__Fusarium; s__Fusarium_concentricum
denovo2471	-14.0989	0.000146889	0.00371111	9.95278	120	1194.33	k__Fungi; p__Ascomycota; c__Eurotiomycetes; o__Eurotiales; f__Aspergillaceae; g__Penicillium; s__Penicillium_halotolerans
denovo2927	-2.37938	0.0760407	0.213425	3.02695	247.333	748.667	k__Fungi; p__Ascomycota; c__unidentified; o__unidentified; f__unidentified; g__unidentified; s__unidentified
denovo455	-2.21065	0.0915597	0.238914	12.8169	351.333	4503	k__Fungi; p__Ascomycota; c__Lecanoromycetes; o__Umbilicariales; f__Umbilicariaceae; g__Umbilicaria; s__Umbilicaria_mammulata
denovo2977	-6.29718	0.00324987	0.0226136	51.6571	396.667	20490.7	k__Fungi; p__Ascomycota; c__Dothideomycetes; o__Capnodiales; f__Mycosphaerellaceae; g__Mycosphaerella; s__Mycosphaerella_tassiana

## Sheet: Table S10
Table S10: Rhizosphere specific Fungi of Pajonales: analysis "locality" and "sample type"
OTU	Test-Statistic	P	FDR_P	Fold Change	Bulk_mean	Rhizosphere_mean	taxonomy
denovo1973	-6.47565	0.00293053	0.0440778	-	0	142.333	k__Fungi; p__Ascomycota; c__Eurotiomycetes; o__Onygenales; f__Onygenaceae; g__Auxarthron; s__unidentified
denovo1781	-3.53643	0.0240906	0.118729	-	0	75.3333	k__Fungi; p__Ascomycota; c__Eurotiomycetes; o__Eurotiales; f__Aspergillaceae; g__Aspergillus; s__Aspergillus_arenarioides
denovo464	-4.02781	0.0157621	0.102651	-	0	59.6667	k__Fungi; p__Ascomycota; c__Eurotiomycetes; o__Eurotiales; f__Trichocomaceae; g__Talaromyces; s__Talaromyces_australis
denovo946	-3.99179	0.0162406	0.102651	-	0	54	k__Fungi; p__Ascomycota; c__Eurotiomycetes; o__Onygenales; f__Onygenales_fam_Incertae_sedis; g__Chrysosporium; s__unidentified
denovo975	-3.49322	0.0250497	0.118729	-	0	48.3333	k__Fungi; p__Ascomycota; c__Eurotiomycetes; o__Eurotiales; f__Trichocomaceae; g__Talaromyces; s__Talaromyces_cecidicola
denovo3054	-2.59975	0.0600642	0.187227	-	0	41.3333	k__Fungi; p__Basidiomycota; c__Tremellomycetes; o__Tremellales; f__Tremellaceae; g__Cryptococcus; s__Cryptococcus_aerius
denovo1607	-4.05821	0.0153714	0.102651	-	0	40.3333	k__Fungi; p__Ascomycota; c__Sordariomycetes; o__Hypocreales; f__Nectriaceae; g__Fusarium; s__Fusarium_concentricum
denovo2053	-4.53921	0.0105034	0.0845161	-	0	25	k__Fungi; p__Ascomycota; c__Eurotiomycetes; o__Onygenales; f__unidentified; g__unidentified; s__unidentified
denovo2306	-6.09994	0.00365413	0.046827	-	0	13.3333	k__Fungi; p__Chytridiomycota; c__Rhizophlyctidomycetes; o__Rhizophlyctidales; f__Rhizophlyctidaceae; g__Rhizophlyctis; s__Rhizophlyctis_rosea
denovo529	-7.20119	0.00197091	0.0376415	-	0	11	k__Fungi; p__Ascomycota; c__Sordariomycetes; o__Sordariales; f__Chaetomiaceae; g__unidentified; s__unidentified
denovo3260	-3.11086	0.0358422	0.150209	-	0	10	k__Fungi; p__Basidiomycota; c__Agaricomycetes; o__Agaricales; f__Agaricaceae; g__Coprinus; s__unidentified
denovo675	-3.77964	0.0194418	0.112742	-	0	6.66667	k__Fungi; p__Ascomycota; c__Sordariomycetes; o__Hypocreales; f__Nectriaceae; g__Fusarium; s__unidentified
denovo2270	-6.36396	0.00312559	0.0440778	10	0.666667	6.66667	k__Fungi; p__Ascomycota; c__Sordariomycetes; o__Microascales; f__Microascaceae; g__Scopulariopsis; s__Scopulariopsis_acremonium
denovo1755	-1.60046	0.184749	0.347408	5.16667	2	10.3333	k__Fungi; p__Ascomycota; c__Sordariomycetes; o__Hypocreales; f__Ophiocordycipitaceae; g__unidentified; s__unidentified
denovo166	-3.56887	0.0233994	0.117336	4.14286	2.33333	9.66667	k__Fungi; p__Ascomycota; c__Eurotiomycetes; o__Eurotiales; f__Aspergillaceae; g__Penicillium; s__Penicillium_astrolabium
denovo2023	-1.34538	0.249709	0.413635	3.57143	2.33333	8.33333	k__Fungi; p__Mortierellomycota; c__Mortierellomycetes; o__Mortierellales; f__Mortierellaceae; g__Mortierella; s__unidentified
denovo3586	-2.64757	0.0571267	0.184046	3.07692	4.33333	13.3333	k__Fungi; p__unidentified; c__unidentified; o__unidentified; f__unidentified; g__unidentified; s__unidentified
denovo1439	-4.30464	0.0125993	0.0968745	70.6667	5	353.333	k__Fungi; p__unidentified; c__unidentified; o__unidentified; f__unidentified; g__unidentified; s__unidentified
denovo1989	-1.37278	0.241755	0.406702	3.73333	5	18.6667	k__Fungi; p__Ascomycota; c__Eurotiomycetes; o__Eurotiales; f__Aspergillaceae; g__Penicillium; s__Penicillium_simile
denovo809	-3.99899	0.0161436	0.102651	31.4118	5.66667	178	k__Fungi; p__Ascomycota; c__Dothideomycetes; o__Pleosporales; f__unidentified; g__unidentified; s__unidentified
denovo943	-2.50551	0.0663746	0.196287	10.4118	5.66667	59	k__Fungi; p__Mortierellomycota; c__Mortierellomycetes; o__Mortierellales; f__Mortierellaceae; g__Mortierella; s__Mortierella_alpina
denovo1687	-8.26752	0.00116798	0.0376415	14	6.66667	93.3333	k__Fungi; p__Ascomycota; c__Eurotiomycetes; o__Onygenales; f__Onygenales_fam_Incertae_sedis; g__Malbranchea; s__Malbranchea_cinnamomea
denovo157	-10.5669	0.000453798	0.0224306	45	7.66667	345	k__Fungi; p__Ascomycota; c__Sordariomycetes; o__Hypocreales; f__unidentified; g__unidentified; s__unidentified
denovo1084	-5.3936	0.00571653	0.06181	7.95652	7.66667	61	k__Fungi; p__Ascomycota; c__Eurotiomycetes; o__Eurotiales; f__unidentified; g__unidentified; s__unidentified
denovo1485	-17.8702	5.7627e-05	0.00664631	15.0811	12.3333	186	k__Fungi; p__Ascomycota; c__Eurotiomycetes; o__Onygenales; f__Onygenaceae; g__Auxarthron; s__Auxarthron_alboluteum
denovo1410	-3.13711	0.0349451	0.150209	3.24324	12.3333	40	k__Fungi; p__Ascomycota; c__Dothideomycetes; o__Pleosporales; f__Sporormiaceae; g__Preussia; s__Preussia_flanaganii
denovo1413	-1.02152	0.364759	0.498313	132.293	13.6667	1808	k__Fungi; p__Ascomycota; c__Sordariomycetes; o__Sordariales; f__Sordariales_fam_Incertae_sedis; g__Monosporascus; s__Monosporascus_ibericus
denovo666	-8.01589	0.00131394	0.0376415	813.222	15	12198.3	k__Fungi; p__Basidiomycota; c__Agaricomycetes; o__Agaricales; f__Agaricaceae; g__Cystolepiota; s__unidentified
denovo1407	-11.2089	0.000360744	0.0208029	10.717	17.6667	189.333	k__Fungi; p__Ascomycota; c__Sordariomycetes; o__Microascales; f__unidentified; g__unidentified; s__unidentified
denovo2599	-1.12417	0.323841	0.478842	3.08333	20	61.6667	k__Fungi; p__Ascomycota; c__Sordariomycetes; o__Microascales; f__unidentified; g__unidentified; s__unidentified
denovo461	-2.18804	0.0938969	0.235972	6.75806	20.6667	139.667	k__Fungi; p__Ascomycota; c__Dothideomycetes; o__Pleosporales; f__Phaeosphaeriaceae; g__Paraphoma; s__unidentified
denovo1896	-1.18349	0.302146	0.46054	3.84127	21	80.6667	k__Fungi; p__Ascomycota; c__Sordariomycetes; o__Coniochaetales; f__Coniochaetaceae; g__unidentified; s__unidentified
denovo629	-4.25448	0.0131111	0.0969796	40.6176	22.6667	920.667	k__Fungi; p__Ascomycota; c__Sordariomycetes; o__Hypocreales; f__Stachybotryaceae; g__Stachybotrys; s__Stachybotrys_chartarum
denovo656	-3.11788	0.0355994	0.150209	4.31169	25.6667	110.667	k__Fungi; p__Ascomycota; c__Dothideomycetes; o__Pleosporales; f__Pleosporaceae; g__Alternaria; s__Alternaria_chlamydosporigena
denovo645	-6.33612	0.00317668	0.0440778	36.5429	35	1279	k__Fungi; p__Basidiomycota; c__Agaricomycetes; o__Agaricales; f__Bolbitiaceae; g__Conocybe; s__unidentified
denovo1676	-3.77318	0.0195507	0.112742	8.14394	44	358.333	k__Fungi; p__Ascomycota; c__unidentified; o__unidentified; f__unidentified; g__unidentified; s__unidentified
denovo1827	-1.89715	0.130668	0.279081	10.1511	46.3333	470.333	k__Fungi; p__Ascomycota; c__Pezizomycetes; o__Pezizales; f__Pyronemataceae; g__unidentified; s__unidentified
denovo983	-2.39665	0.0746269	0.206895	5.61413	61.3333	344.333	k__Fungi; p__Ascomycota; c__Sordariomycetes; o__Sordariales; f__Lasiosphaeriaceae; g__Podospora; s__unidentified
denovo2325	-1.70182	0.164006	0.324263	4.43154	80.3333	356	k__Fungi; p__Ascomycota; c__Dothideomycetes; o__Pleosporales; f__Sporormiaceae; g__Preussia; s__unidentified
denovo2051	-3.2611	0.0310487	0.140987	5.41544	90.6667	491	k__Fungi; p__Ascomycota; c__Sordariomycetes; o__Microascales; f__Microascaceae; g__unidentified; s__unidentified
denovo3604	-5.94501	0.0040157	0.0496226	9.6587	97.6667	943.333	k__Fungi; p__Ascomycota; c__Sordariomycetes; o__Hypocreales; f__Stachybotryaceae; g__Myrothecium; s__Myrothecium_roridum
denovo1362	-5.29813	0.00609488	0.0627988	9.86286	274.667	2709	k__Fungi; p__Mucoromycota; c__Mucoromycetes; o__Mucorales; f__Rhizopodaceae; g__Rhizopus; s__Rhizopus_arrhizus
denovo488	-1.23563	0.284205	0.449018	3.32343	291.667	969.333	k__Fungi; p__Ascomycota; c__Pezizomycetes; o__unidentified; f__unidentified; g__unidentified; s__unidentified
denovo266	-3.85993	0.0181483	0.110164	5.04917	440.667	2225	k__Fungi; p__Ascomycota; c__Dothideomycetes; o__Pleosporales; f__Sporormiaceae; g__Preussia; s__Preussia_flanaganii
denovo141	-16.1101	8.68318e-05	0.00751095	39.9052	573	22865.7	k__Fungi; p__Ascomycota; c__Sordariomycetes; o__unidentified; f__unidentified; g__unidentified; s__unidentified
denovo785	-4.77443	0.0088114	0.078173	3.70882	888.333	3294.67	k__Fungi; p__Ascomycota; c__Eurotiomycetes; o__Eurotiales; f__Aspergillaceae; g__Penicillium; s__Penicillium_jensenii
denovo2985	-1.0943	0.335297	0.486023	3.27133	1254.33	4103.33	k__Fungi; p__Basidiomycota; c__Agaricomycetes; o__Agaricales; f__Psathyrellaceae; g__Coprinellus; s__Coprinellus_christianopolitanus
denovo2331	-5.19005	0.00656082	0.0648584	4.79896	1666.33	7996.67	k__Fungi; p__Basidiomycota; c__Agaricomycetes; o__Agaricales; f__Pleurotaceae; g__Hohenbuehelia; s__Hohenbuehelia_portegna
denovo988	-8.01394	0.00131516	0.0376415	3.59711	1821	6550.33	k__Fungi; p__Ascomycota; c__Sordariomycetes; o__Sordariales; f__Chaetomiaceae; g__Chaetomium; s__Chaetomium_undulatulum

[truncated: 13 more sheets: Table S11, Table S12, Table S13, Table S14, Table S15, Table S16, Table S17, Table S18, Table S19, Table S20, Table S21, Table S22, Table S23]
